# Supplementary material for: Heterostructure Fe2O3 nanorods@imine-based covalent organic framework for long cycling and high-rate lithium storage
Source: Royal Society of Chemistry journal article supplement (doi:10.1039/d1nr07209a), 2022-01-01
Supplement: d1nr07209a1.pdf [file d1nr07209a1.pdf]

## Supporting Information

# Heterostructure Fe<sub>2</sub>O<sub>3</sub> nanorods@imine-based covalent organic framework for long-cycling and high-rate lithium storage

Zhiwen Long<sup>a</sup>, Chu Shi<sup>a</sup>, Caiqin Wu<sup>a</sup>, Luhan Yuan<sup>a</sup>, Hui Qiao<sup>a,\*</sup>, Keliang Wang<sup>b,\*</sup>

<sup>a</sup> Key Laboratory of Eco-textiles, Ministry of Education, Jiangnan University, Wuxi 214122, China

<sup>b</sup> Fraunhofer USA, Inc., Center Midwest, Division for Coatings and Diamond Technologies, Michigan State University, East Lansing, MI 48824, USA

---

\* Corresponding author. Tel/Fax: +86-510-8591-2009  
E-mail: [huiqiao@jiangnan.edu.cn](mailto:huiqiao@jiangnan.edu.cn) (H. Qiao), [klwang@msu.edu](mailto:klwang@msu.edu) (K. Wang)

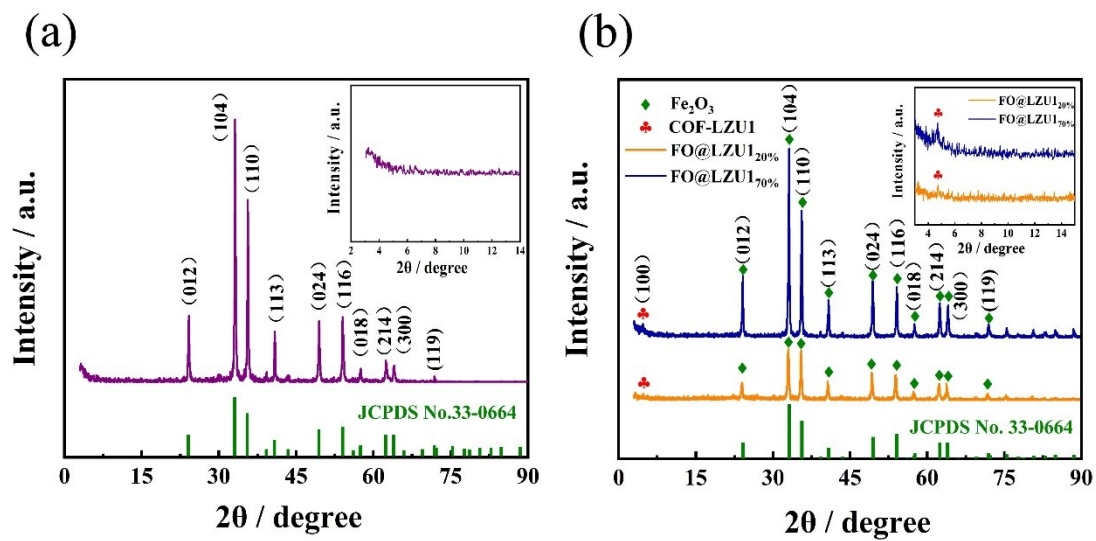

**Fig. S1** XRD patterns of  $\alpha$ -Fe<sub>2</sub>O<sub>3</sub> (a) and FO@LZU<sub>120%</sub>, FO@LZU<sub>170%</sub> (b).

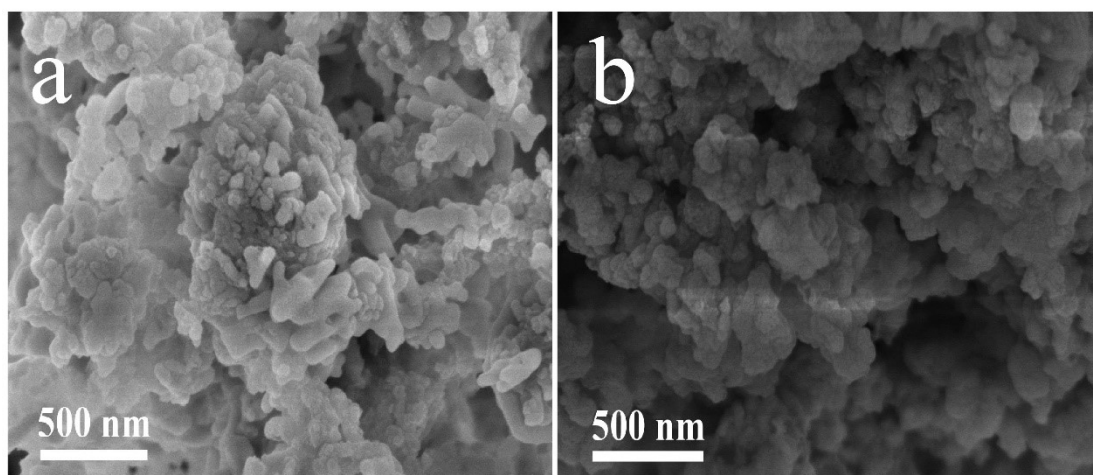

**Fig. S2** SEM images of FO@LZU<sub>120%</sub> (a) and FO@LZU<sub>170%</sub> (b).

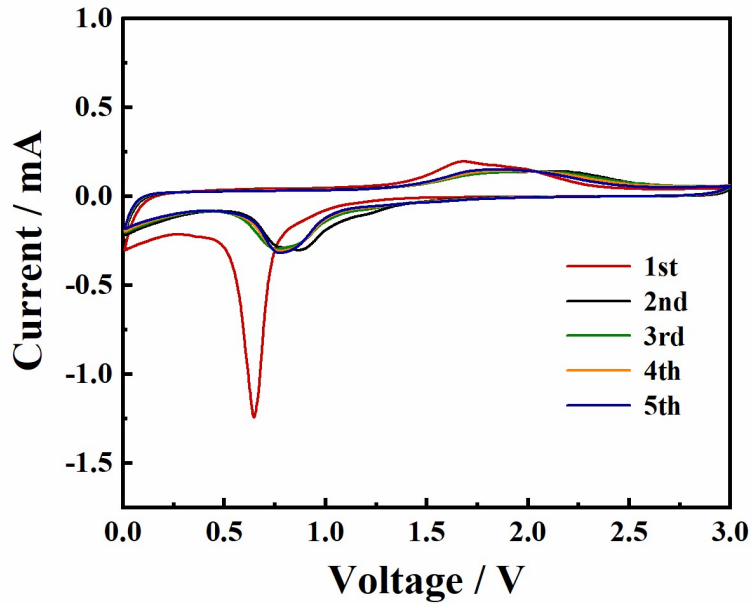

Fig. S3 CV curves of  $\alpha$ -Fe<sub>2</sub>O<sub>3</sub>.

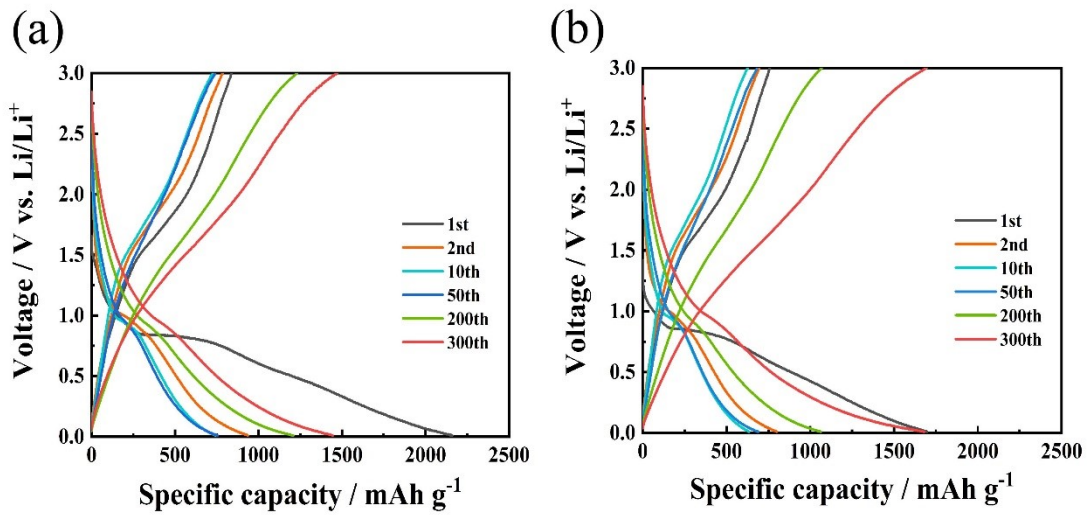

Fig. S4 The discharge/charge profiles for the 1st, 2nd, 10th, 50th, 200th, 300th of FO@LZU1<sub>20%</sub> (a) and FO@LZU1<sub>70%</sub> (b).

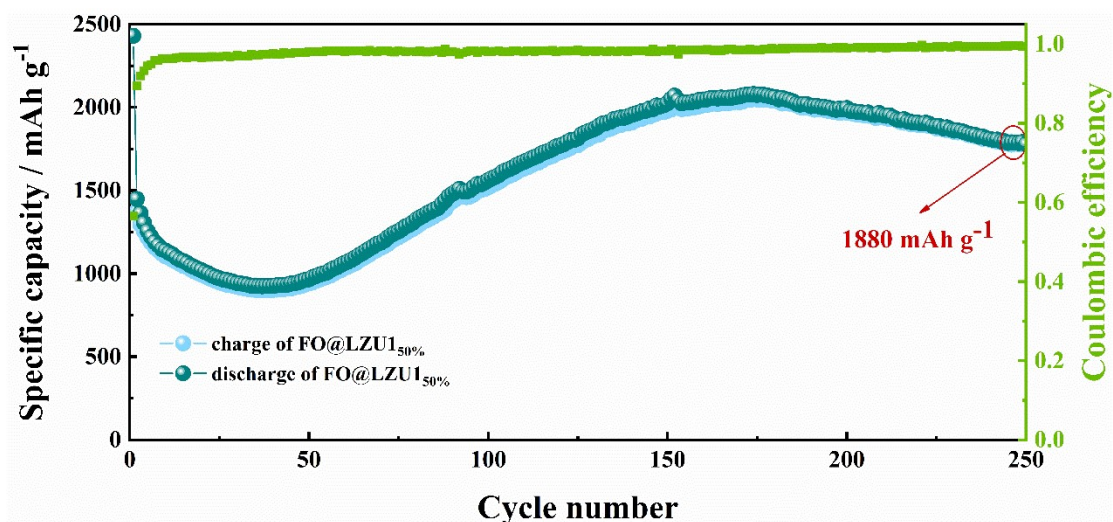

Fig. S5 The cycling performance of FO@LZU1<sub>50%</sub> at 0.5 A g<sup>-1</sup> after 250 cycles.

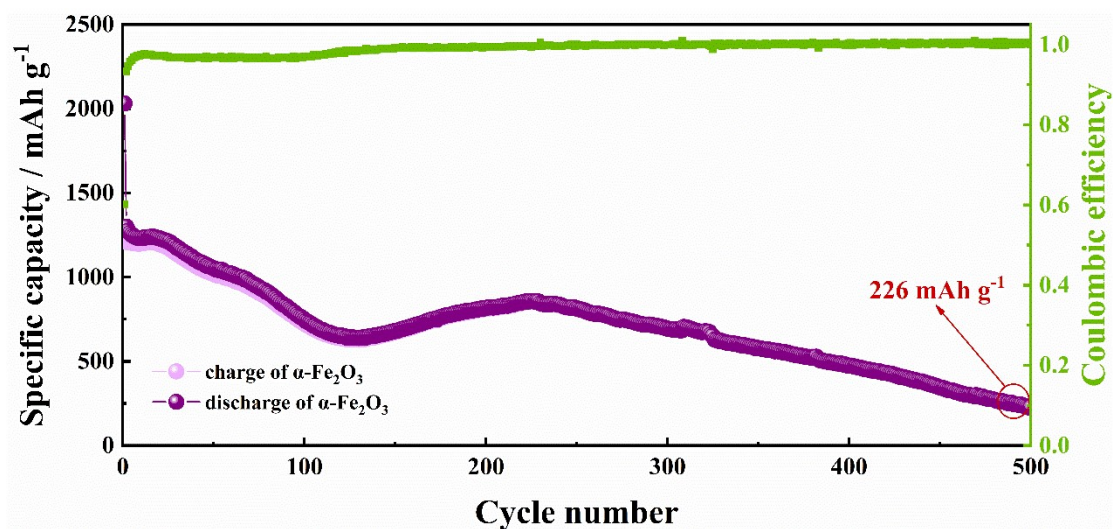

Fig. S6 The cycling performance of α-Fe<sub>2</sub>O<sub>3</sub> at 1 A g<sup>-1</sup> after 500 cycles.



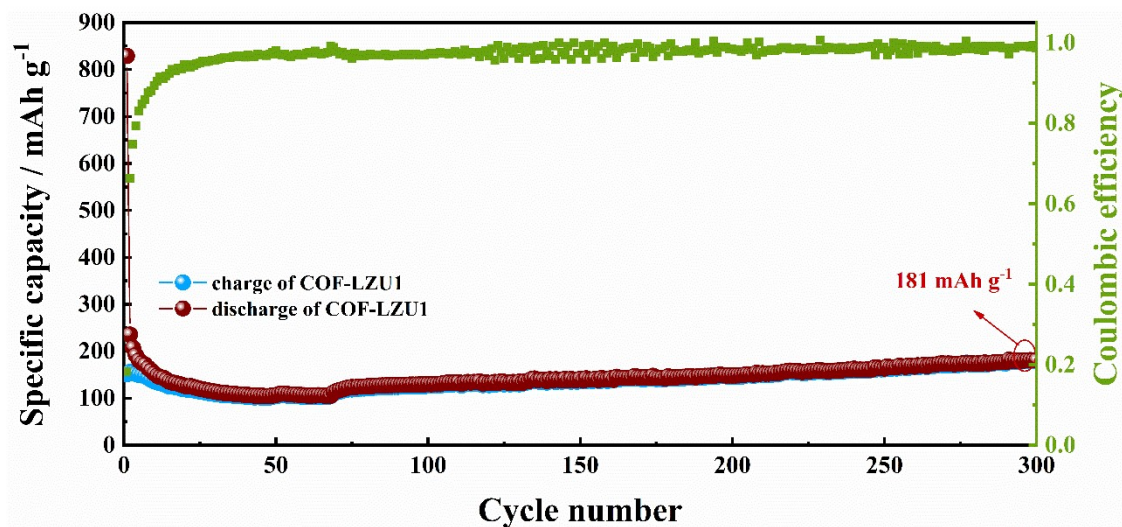

Fig. S7 The cycling performance of COF-LZU1 at 1 A g<sup>-1</sup> after 300 cycles.

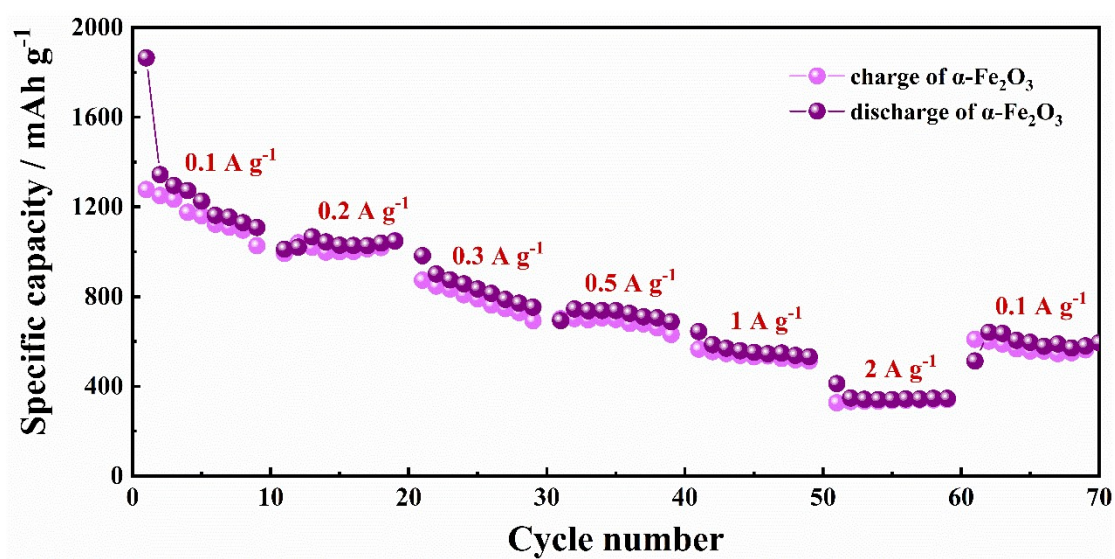

Fig. S8 Rate performance of α-Fe<sub>2</sub>O<sub>3</sub>.

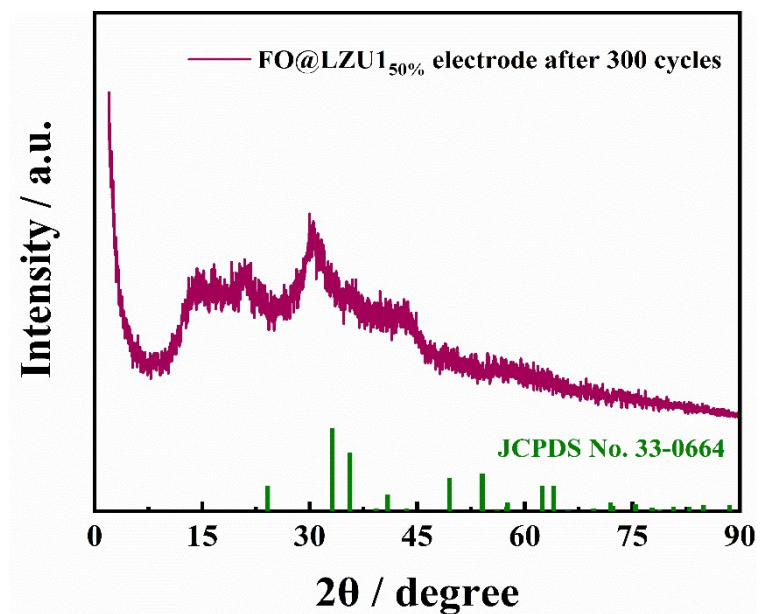

Fig. S9 XRD patterns of FO@LZU<sub>150%</sub> after 300 cycles.

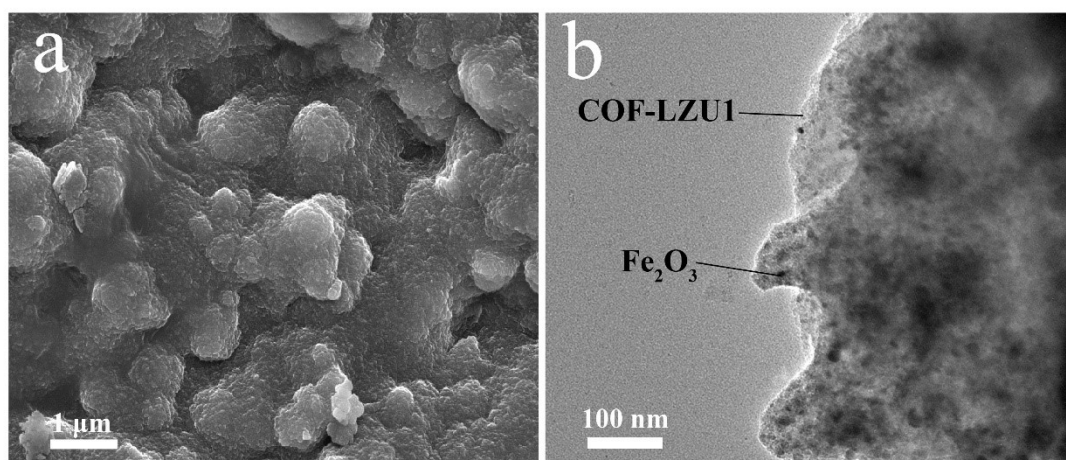

Fig. S10 SEM image (a) and TEM image (b) of FO@LZU<sub>150%</sub> after 300 cycles.
